# Supplementary material for: The network structure in transient telechelic polymer networks: extension of the Miller–Macosko model
Source: Royal Society of Chemistry journal article supplement (doi:10.1039/d3cp04700h), 2023-01-01
Supplement: d3cp04700h1.pdf [file d3cp04700h1.pdf]

- Supporting Information -

**Network Structure in Telechelic Transient Polymer Networks:  
Extension of the Miller–Macosko’s Model**

*Mostafa Ahmadi, Rosha Yazdanimoghaddam, Farhad Sharif*

**Table S1. Thermodynamic constants for the complexation of tridentate ligands with various metal ions.**

| Metal ion        | Ligand                                             | Complex         | Log $\beta$ | Temperature (°C) | Ref.                   |    |
|------------------|----------------------------------------------------|-----------------|-------------|------------------|------------------------|----|
| Cu <sup>2+</sup> | Arginine                                           | ML <sub>1</sub> | 7.555       | 25               | (Murphy et al., 2020)  |    |
|                  |                                                    | ML <sub>2</sub> | 14.007      |                  |                        |    |
|                  | Asparagine                                         | ML <sub>1</sub> | 7.788       | 37               |                        |    |
|                  |                                                    | ML <sub>2</sub> | 14.142      |                  |                        |    |
|                  | Aspartic acid                                      | ML <sub>1</sub> | 8.83        | 25               |                        |    |
|                  |                                                    | ML <sub>2</sub> | 15.93       |                  |                        |    |
|                  | Glutamine                                          | ML <sub>1</sub> | 7.71        |                  |                        |    |
|                  |                                                    | ML <sub>2</sub> | 14.12       |                  |                        |    |
|                  | Glutamic acid                                      | ML <sub>1</sub> | 8.3         |                  |                        |    |
|                  |                                                    | ML <sub>2</sub> | 15.03       |                  |                        |    |
|                  | Lysine                                             | ML <sub>1</sub> | 7.62        |                  |                        |    |
|                  |                                                    | ML <sub>2</sub> | 13.94       |                  |                        |    |
|                  | Serine                                             | ML <sub>1</sub> | 7.748       |                  |                        | 37 |
|                  |                                                    | ML <sub>2</sub> | 14.083      |                  |                        |    |
| Threonine        | ML <sub>1</sub>                                    | 7.98            | 25          |                  |                        |    |
|                  | ML <sub>2</sub>                                    | 14.66           |             |                  |                        |    |
| Tyrosine         | ML <sub>1</sub>                                    | 7.9             |             |                  |                        |    |
|                  | ML <sub>2</sub>                                    | 15.17           |             |                  |                        |    |
|                  | (1,4,7-triazacyclononanene-N,N,N''-triacetic acid) | ML <sub>1</sub> | 19.8        | 25               | (Martell et al., 1996) |    |
| Fe <sup>2+</sup> | Arginine                                           | ML <sub>1</sub> | 3.2         | 20               | (Murphy et al., 2020)  |    |
|                  | Asparagine                                         | ML <sub>1</sub> | 4.37        | 25               |                        |    |
|                  |                                                    | ML <sub>2</sub> | 7.57        |                  |                        |    |
|                  | Aspartic acid                                      | ML <sub>1</sub> | 5.34        |                  |                        |    |
|                  |                                                    | ML <sub>2</sub> | 8.57        |                  |                        |    |
|                  | Glutamic acid                                      | ML <sub>1</sub> | 3.5         | 20               |                        |    |
| Lysine           | ML <sub>1</sub>                                    | 4.5             |             |                  |                        |    |
| Serine           | ML <sub>1</sub>                                    | 4.299           |             |                  |                        |    |

|                  |                                                    |                 |       |    |                         |
|------------------|----------------------------------------------------|-----------------|-------|----|-------------------------|
|                  |                                                    | ML <sub>2</sub> | 7.377 | 20 |                         |
|                  | Threonine                                          | ML <sub>1</sub> | 3.69  | 40 |                         |
|                  |                                                    | ML <sub>2</sub> | 6.5   |    |                         |
|                  | Tyrosine                                           | ML <sub>2</sub> | 7.1   | 20 |                         |
|                  | Terpyridine                                        | ML <sub>1</sub> | 7.1   |    |                         |
|                  |                                                    | ML <sub>2</sub> | 20.9  |    |                         |
| Fe <sup>3+</sup> | Arginine                                           | ML <sub>1</sub> | 8.7   |    | (H Holyer et al., 1965) |
|                  | Asparagine                                         | ML <sub>1</sub> | 8.6   |    |                         |
|                  | Aspartic acid                                      | ML <sub>1</sub> | 11.4  |    |                         |
|                  | Glutamic acid                                      | ML <sub>1</sub> | 13.39 |    |                         |
|                  | Serine                                             | ML <sub>1</sub> | 9.2   |    |                         |
|                  | Threonine                                          | ML <sub>1</sub> | 8.6   |    |                         |
|                  | (1,4,7-triazacyclononanene-N,N,N''-triacetic acid) | ML <sub>1</sub> | 28.3  | 25 | (Martell et al., 1996)  |
| Mn <sup>2+</sup> | Terpyridine                                        | ML <sub>1</sub> | 4.4   |    |                         |
| Co <sup>2+</sup> | Terpyridine                                        | ML <sub>1</sub> | 8.4   |    | (H Holyer et al., 1965) |
|                  |                                                    | ML <sub>2</sub> | 18.3  |    |                         |
|                  | (1,4,7-triazacyclononanene-N,N,N''-triacetic acid) | ML <sub>1</sub> | 17.5  |    |                         |
| Ni <sup>2+</sup> | Terpyridine                                        | ML <sub>1</sub> | 10.7  |    | (H Holyer et al., 1965) |
|                  |                                                    | ML <sub>2</sub> | 21.8  |    |                         |
| Zn <sup>2+</sup> | Terpyridine                                        | ML <sub>1</sub> | 6     |    |                         |
|                  | (1,4,7-triazacyclononanene-N,N,N''-triacetic acid) | ML <sub>1</sub> | 18.3  | 25 | (Martell et al., 1996)  |
| Cd <sup>2+</sup> | Terpyridine                                        | ML <sub>1</sub> | 5.1   |    | (H Holyer et al., 1965) |
| Ga <sup>2+</sup> | (1,4,7-triazacyclononanene-N,N,N''-triacetic acid) | ML <sub>1</sub> | 31    | 25 | (Martell et al., 1996)  |
| In <sup>2+</sup> | (1,4,7-triazacyclononanene-N,N,N''-triacetic acid) | ML <sub>1</sub> | 26.2  |    |                         |

**Table S2. Thermodynamic constants for the complexation of tridentate ligands with various metal ions.**

| Metal ion        | Ligand          | Complex         | Log $\beta$ | Temperature (°C)        | Ref.                              |
|------------------|-----------------|-----------------|-------------|-------------------------|-----------------------------------|
| Fe <sup>3+</sup> | nitrocatechole  | ML <sub>1</sub> | 17.1        | Not Reported            | (Cazzell & Holten-Andersen, 2019) |
|                  |                 | ML <sub>2</sub> | 30.5        |                         |                                   |
|                  |                 | ML <sub>3</sub> | 40          |                         |                                   |
|                  | Alanine         | ML <sub>1</sub> | 10.98       | 30                      | (Murphy et al., 2020)             |
|                  | Glycine         | ML <sub>1</sub> | 10          | 25                      |                                   |
|                  | Leucine         | ML <sub>1</sub> | 9.9         | 20                      |                                   |
|                  | Phenylalanine   | ML <sub>1</sub> | 10.39       | 25                      |                                   |
|                  |                 | ML <sub>2</sub> | 19.1        |                         |                                   |
|                  |                 | ML <sub>3</sub> | 26          |                         |                                   |
|                  | Proline         | ML <sub>2</sub> | 10          | 20                      |                                   |
|                  | Tryptophan      | ML <sub>1</sub> | 9           |                         |                                   |
| Valine           | ML <sub>1</sub> | 9.6             |             |                         |                                   |
| Fe <sup>2+</sup> | Alanine         | ML <sub>1</sub> | 3.54        | (Murphy et al., 2020)   |                                   |
|                  | Glycine         | ML <sub>1</sub> | 4.13        |                         |                                   |
|                  |                 | ML <sub>2</sub> | 7.65        |                         |                                   |
|                  | Leucine         | ML <sub>1</sub> | 3.42        |                         | 20                                |
|                  | Phenylalanine   | ML <sub>1</sub> | 3.74        |                         | 25                                |
|                  |                 | ML <sub>2</sub> | 7.19        |                         |                                   |
|                  |                 | ML <sub>3</sub> | 10.7        |                         |                                   |
|                  | Proline         | ML <sub>2</sub> | 8.3         |                         | 20                                |
|                  | Tryptophan      | ML <sub>1</sub> | 3.92        |                         | 25                                |
|                  |                 | ML <sub>2</sub> | 7.39        |                         |                                   |
|                  |                 | ML <sub>3</sub> | 9.5         |                         |                                   |
| Valine           | ML <sub>1</sub> | 3.39            | 20          |                         |                                   |
| Bipyridine       | ML <sub>1</sub> | 4.3             | 25          | (H Holyer et al., 1965) |                                   |
|                  | ML <sub>3</sub> | 17.5            |             |                         |                                   |
| histidine        | ML <sub>1</sub> | 5.88            | 25          | (Murphy et al., 2020)   |                                   |
|                  | ML <sub>2</sub> | 10.43           |             |                         |                                   |
| Al <sup>3+</sup> | nitrocatechole  | ML <sub>1</sub> | 13.74       | Not Reported            | (Cazzell & Holten-Andersen, 2019) |
|                  |                 | ML <sub>2</sub> | 25.4        |                         |                                   |
|                  |                 | ML <sub>3</sub> | 34.3        |                         |                                   |
| Cu <sup>2+</sup> | alanine         | ML <sub>1</sub> | 8.17        | 30                      | (Murphy et al., 2020)             |
|                  |                 | ML <sub>2</sub> | 14.94       |                         |                                   |
| Cu <sup>2+</sup> | Glycine         | ML <sub>1</sub> | 8.07        | 25                      |                                   |
|                  |                 | ML <sub>2</sub> | 14.86       |                         |                                   |
|                  | Isoleucine      | ML <sub>1</sub> | 8.5         |                         |                                   |
|                  |                 | ML <sub>2</sub> | 15.79       |                         |                                   |
| Leucine          | ML <sub>1</sub> | 8.276           | 25          |                         |                                   |
|                  | ML <sub>2</sub> | 15.174          |             |                         |                                   |
| Phenylalanine    | ML <sub>1</sub> | 7.93            | 25          |                         |                                   |

|                            |                 |                 |       |                         |                                   |                       |
|----------------------------|-----------------|-----------------|-------|-------------------------|-----------------------------------|-----------------------|
|                            |                 | ML <sub>2</sub> | 14.83 | 25                      | (Griffith et al., 1965)           |                       |
|                            | Phenanthroline  | ML <sub>1</sub> | 9     |                         |                                   |                       |
|                            |                 | ML <sub>2</sub> | 15.7  |                         |                                   |                       |
|                            |                 | ML <sub>3</sub> | 20.7  |                         |                                   |                       |
|                            | Bipyridine      | ML <sub>1</sub> | 8     | 37                      | (Murphy et al., 2020)             |                       |
|                            | Histidine       | ML <sub>1</sub> | 9.75  |                         |                                   |                       |
|                            | Proline         | ML <sub>1</sub> | 8.6   | 25                      |                                   |                       |
|                            |                 | ML <sub>2</sub> | 15.09 |                         |                                   |                       |
|                            | Tryptophan      | ML <sub>1</sub> | 8.02  |                         |                                   |                       |
|                            |                 | ML <sub>2</sub> | 15.56 |                         |                                   |                       |
| Valine                     | ML <sub>1</sub> | 8.05            | 30    |                         |                                   |                       |
|                            | ML <sub>2</sub> | 14.91           |       |                         |                                   |                       |
| Cu <sup>+</sup>            | alanine         | ML <sub>1</sub> | 9.6   | 25                      |                                   | (Murphy et al., 2020) |
|                            | Glycine         | ML <sub>1</sub> | 10    |                         |                                   |                       |
|                            | histidine       | ML <sub>1</sub> | 12.8  |                         |                                   |                       |
|                            |                 | ML <sub>2</sub> | 25.2  |                         |                                   |                       |
| Mn <sup>2+</sup>           | Phenanthroline  | ML <sub>1</sub> | 3.6   | 25                      | (Griffith et al., 1965)           |                       |
|                            | Bipyridine      | ML <sub>1</sub> | 2.6   | 25                      | (H Holyer et al., 1965)           |                       |
| Co <sup>2+</sup>           | Phenanthroline  | ML <sub>1</sub> | 7.2   |                         |                                   |                       |
|                            |                 | ML <sub>3</sub> | 16.1  |                         |                                   |                       |
| 4,4 dimethyl 2,2 bipyridyl | ML <sub>1</sub> | 6.4             | 25    | (Martell & Smith, 1989) |                                   |                       |
|                            | ML <sub>2</sub> | 11.3            |       |                         |                                   |                       |
|                            | ML <sub>3</sub> | 16.6            |       |                         |                                   |                       |
| Ni <sup>2+</sup>           | Bipyridine      | ML <sub>1</sub> | 7.1   | 25                      | (H Holyer et al., 1965)           |                       |
|                            | Bipyridine      | ML <sub>2</sub> | 12.1  | 25                      | (Griffith et al., 1965)           |                       |
|                            | Bipyridine      | ML <sub>3</sub> | 20.1  | 25                      | (H Holyer et al., 1965)           |                       |
|                            | histidine       | ML <sub>1</sub> | 6.78  | Not Reported            | (Cazzell & Holten-Andersen, 2019) |                       |
|                            |                 | ML <sub>2</sub> | 11.78 |                         |                                   |                       |
| ML <sub>3</sub>            |                 | 14.9            |       |                         |                                   |                       |
| Zn <sup>2+</sup>           | Phenanthroline  | ML <sub>1</sub> | 5.7   | 25                      | (Griffith et al., 1965)           |                       |
|                            | 2,2 -Bipyridyl  | ML <sub>1</sub> | 5.12  | 25                      | (Martell & Smith, 1989)           |                       |
|                            |                 | ML <sub>2</sub> | 9.63  |                         |                                   |                       |
| ML <sub>3</sub>            |                 | 13.3            |       |                         |                                   |                       |
| Cd <sup>2+</sup>           | Bipyridine      | ML <sub>1</sub> | 4.3   | 25                      | (H Holyer et al., 1965)           |                       |
|                            | Phenanthroline  | ML <sub>1</sub> | 5.4   | 25                      | (Griffith et al., 1965)           |                       |
|                            | 2,2 -Bipyridyl  | ML <sub>1</sub> | 4.22  | 25                      | (Martell & Smith, 1989)           |                       |
|                            |                 | ML <sub>3</sub> | 10.4  |                         |                                   |                       |
| Hg <sup>2+</sup>           | Bipyridine      | ML <sub>1</sub> | 9.6   | 25                      | (Griffith et al., 1965)           |                       |

|                  |                |                 |   |  |  |
|------------------|----------------|-----------------|---|--|--|
| Ag <sup>2+</sup> | Phenanthroline | ML <sub>1</sub> | 5 |  |  |
|                  |                | ML <sub>2</sub> | 7 |  |  |

**Table S3. Thermodynamic constants for the complexation of monodentate ligands with various metal ions.**

| Metal ion        | Ligand             | Complex         | Logβ  | Temperature (°C) | Ref.                    |
|------------------|--------------------|-----------------|-------|------------------|-------------------------|
| Ni <sup>2+</sup> | Pyridine           | ML <sub>1</sub> | 2.1   | 25               | (Griffith et al., 1965) |
|                  | Pyridine           | ML <sub>1</sub> | 1.88  | 25               | (Martell & Smith, 1989) |
|                  |                    | ML <sub>2</sub> | 4.98  |                  |                         |
|                  |                    | ML <sub>3</sub> | 8.58  |                  |                         |
|                  |                    | ML <sub>4</sub> | 11.98 |                  |                         |
|                  | 1-methyl Imidazole | ML <sub>1</sub> | 3.05  | 25               | (Aruga, 1983)           |
|                  | Pyrazole           | ML <sub>1</sub> | 1.8   | 25               | (Martell & Smith, 1989) |
|                  |                    | ML <sub>2</sub> | 5.1   |                  |                         |
|                  |                    | ML <sub>3</sub> | 9.3   |                  |                         |
|                  |                    | ML <sub>4</sub> | 13.9  |                  |                         |
|                  | 1-Ethylimidazole   | ML <sub>1</sub> | 3.04  | 25               | (Martell & Smith, 1989) |
|                  |                    | ML <sub>2</sub> | 8.54  |                  |                         |
|                  |                    | ML <sub>3</sub> | 16.04 |                  |                         |
|                  |                    | ML <sub>4</sub> | 25.04 |                  |                         |
|                  |                    | ML <sub>5</sub> | 34.84 |                  |                         |
|                  |                    | ML <sub>6</sub> | 45.04 |                  |                         |
|                  | 1-Propylimidazole  | ML <sub>1</sub> | 3.06  | 25               | (Martell & Smith, 1989) |
|                  |                    | ML <sub>2</sub> | 8.66  |                  |                         |
|                  |                    | ML <sub>3</sub> | 16.26 |                  |                         |
|                  |                    | ML <sub>4</sub> | 25.46 |                  |                         |
| ML <sub>5</sub>  |                    | 35.76           |       |                  |                         |
| ML <sub>6</sub>  |                    | 46.76           |       |                  |                         |
| Co <sup>2+</sup> | 1-methyl Imidazole | ML <sub>1</sub> | 2.4   | 25               | (Aruga, 1983)           |
|                  | 1-methyl Imidazole | ML <sub>2</sub> | 6.54  | 25               | (Martell & Smith, 1989) |
|                  |                    | ML <sub>3</sub> | 11.86 |                  |                         |
|                  |                    | ML <sub>4</sub> | 18.56 |                  |                         |
|                  | Pyridine           | ML <sub>1</sub> | 1.2   | 25               | (Martell & Smith, 1989) |
|                  |                    | ML <sub>2</sub> | 2.95  |                  |                         |
|                  |                    | ML <sub>3</sub> | 4.75  |                  |                         |
|                  |                    | ML <sub>4</sub> | 6.35  |                  |                         |
|                  | Pyrazole           | ML <sub>1</sub> | 1.3   | 25               | (Martell & Smith, 1989) |
|                  |                    | ML <sub>2</sub> | 3.6   |                  |                         |
| ML <sub>3</sub>  |                    | 6.5             |       |                  |                         |

|                  |                    |                 |       |    |                         |
|------------------|--------------------|-----------------|-------|----|-------------------------|
|                  | 1-Ethylimidazole   | ML <sub>4</sub> | 9.7   |    |                         |
|                  |                    | ML <sub>1</sub> | 2.32  |    |                         |
|                  |                    | ML <sub>2</sub> | 6.52  |    |                         |
|                  |                    | ML <sub>3</sub> | 11.92 |    |                         |
|                  |                    | ML <sub>4</sub> | 18.92 |    |                         |
|                  |                    | ML <sub>5</sub> | 26.32 |    |                         |
|                  | 1-Propylimidazole  | ML <sub>1</sub> | 2.38  |    |                         |
|                  |                    | ML <sub>2</sub> | 6.58  |    |                         |
|                  |                    | ML <sub>3</sub> | 11.98 |    |                         |
|                  |                    | ML <sub>4</sub> | 18.88 |    |                         |
|                  |                    | ML <sub>5</sub> | 26.78 |    |                         |
|                  |                    | ML <sub>6</sub> | 35.18 |    |                         |
| Zn <sup>2+</sup> | 1-methyl Imidazole | ML <sub>1</sub> | 2.7   | 25 | (Aruga, 1983)           |
|                  | Pyridine           | ML <sub>1</sub> | 1.08  | 25 | (Martell & Smith, 1989) |
|                  |                    | ML <sub>2</sub> | 2.58  |    |                         |
|                  |                    | ML <sub>3</sub> | 4.18  |    |                         |
|                  |                    | ML <sub>4</sub> | 5.58  |    |                         |
|                  | Pyrazole           | ML <sub>1</sub> | 1.1   |    |                         |
|                  |                    | ML <sub>2</sub> | 3     |    |                         |
|                  |                    | ML <sub>3</sub> | 5.5   |    |                         |
|                  |                    | ML <sub>4</sub> | 8.2   |    |                         |
|                  | 1-Ethylimidazole   | ML <sub>1</sub> | 2.5   |    |                         |
|                  |                    | ML <sub>2</sub> | 7.3   |    |                         |
|                  |                    | ML <sub>3</sub> | 14.7  |    |                         |
|                  |                    | ML <sub>4</sub> | 24    |    |                         |
|                  | 1-Propylimidazole  | ML <sub>1</sub> | 2.62  |    |                         |
|                  |                    | ML <sub>2</sub> | 7.32  |    |                         |
| ML <sub>3</sub>  |                    | 14.52           |       |    |                         |
| ML <sub>4</sub>  |                    | 23.72           |       |    |                         |
| ML <sub>5</sub>  |                    | 33.72           |       |    |                         |
| Cu <sup>2+</sup> | 1-methyl Imidazole | ML <sub>1</sub> | 4.3   | 25 | (Aruga, 1983)           |
|                  | Pyridine           | ML <sub>1</sub> | 2.54  | 25 | (Martell & Smith, 1989) |
|                  |                    | ML <sub>2</sub> | 6.94  | 25 |                         |
|                  |                    | ML <sub>3</sub> | 12.64 |    |                         |
|                  |                    | ML <sub>4</sub> | 19.04 |    |                         |
|                  | Hydrogen azid      | ML <sub>1</sub> | 2.86  | 25 |                         |
|                  |                    | ML <sub>2</sub> | 5.42  |    |                         |
|                  |                    | ML <sub>3</sub> | 9.9   |    |                         |
|                  |                    | ML <sub>4</sub> | 16.01 |    |                         |
|                  | Pyrazole           | ML <sub>1</sub> | 2.33  |    |                         |
| ML <sub>2</sub>  |                    | 6.53            |       |    |                         |

|                  |                        |                 |       |    |                        |
|------------------|------------------------|-----------------|-------|----|------------------------|
|                  |                        | ML <sub>3</sub> | 12.23 |    |                        |
|                  |                        | ML <sub>4</sub> | 18.83 |    |                        |
|                  | 1-Ethylimidazole       | ML <sub>1</sub> | 4.4   |    |                        |
|                  |                        | ML <sub>2</sub> | 12.4  |    |                        |
|                  |                        | ML <sub>3</sub> | 23.4  |    |                        |
|                  |                        | ML <sub>4</sub> | 36.6  |    |                        |
|                  |                        | ML <sub>5</sub> | 50.08 |    |                        |
|                  | 1-Propylimidazole      | ML <sub>1</sub> | 4.25  |    |                        |
|                  |                        | ML <sub>2</sub> | 12.05 |    |                        |
|                  |                        | ML <sub>3</sub> | 22.75 |    |                        |
| ML <sub>4</sub>  |                        | 35.85           |       |    |                        |
| ML <sub>5</sub>  |                        | 50.5            |       |    |                        |
| Fe <sup>3+</sup> | Hydrogen azid          | ML <sub>1</sub> | 4.51  |    |                        |
|                  |                        | ML <sub>2</sub> | 7.48  |    |                        |
|                  |                        | ML <sub>3</sub> | 9.58  |    |                        |
|                  |                        | ML <sub>4</sub> | 10.95 |    |                        |
|                  |                        | ML <sub>5</sub> | 11.8  |    |                        |
| Fe <sup>2+</sup> | Pyrazole               | ML <sub>1</sub> | 0.8   | 25 |                        |
|                  |                        | ML <sub>2</sub> | 1.9   |    |                        |
|                  |                        | ML <sub>3</sub> | 3.2   |    |                        |
|                  |                        | ML <sub>4</sub> | 4.7   |    |                        |
| Cd <sup>2+</sup> | Pyrazole               | ML <sub>1</sub> | 1.1   |    |                        |
|                  |                        | ML <sub>2</sub> | 2.7   |    |                        |
|                  |                        | ML <sub>3</sub> | 4.5   |    |                        |
| In <sup>2+</sup> | Hydrogen azide         | ML <sub>1</sub> | 3.19  |    |                        |
|                  |                        | ML <sub>2</sub> | 5.61  |    |                        |
|                  |                        | ML <sub>3</sub> | 7.26  |    |                        |
|                  |                        | ML <sub>4</sub> | 8.46  |    |                        |
| Th <sup>4+</sup> | picolinic acid-N-oxide | ML <sub>1</sub> | 4.4   | 25 | (Dumpala et al., 2018) |
|                  |                        | ML <sub>2</sub> | 7.69  |    |                        |
|                  |                        | ML <sub>3</sub> | 10.46 |    |                        |
|                  |                        | ML <sub>4</sub> | 12.08 |    |                        |



**Figure S1.** Definition of the equilibrium constant, on the log scale, as a continuous function of the complex geometry for a metal–ligand combination capable of forming up to six coordinative bonds: the representative distributions are shown for a bis-, tetra-, and a hexa-selective system. The discrete  $\log K_i$  values used in the modeling for each distribution of  $\log K$  curves are shown by open circles.



**Figure S2.** Composition of various complexes ( $[ML_i]/[L]_0$ ) as denoted in the legend for (a) mono-, (b) bis-, (c) tris-, (d) tetra-, (e) penta-, and (f) hexa-selective system.



**Figure S3.** Fraction of (a) 2-fold and (b) 3-fold connected tri-arm polymer precursors in combination with a complex that forms up to 6 transient bonds; the corresponding (c) probability of being connected to a finite network, and (d) logarithm of the normalized modulus.



**Figure S4.** Fraction of (a) 2-fold, (b) 3-fold, and (c) 4-fold connected tetra-arm polymer precursors in combination with a complex that forms up to 6 transient bonds; the corresponding (d) probability of being connected to a finite network, and (e) logarithm of the normalized modulus.



**Figure S5. Fraction of (a) 2-fold, (b) 3-fold, (c) 4-fold, (d) 5-fold, and (e) 6-fold connected hexa-arm polymer precursors in combination with a complex that forms up to 6 transient bonds; the corresponding (f) probability of being connected to a finite network, and (g) logarithm of the normalized modulus.**



**Figure S6. Fraction of (a) 2-fold, (b) 3-fold, (c) 4-fold, (d) 5-fold, (e) 6-fold, and (f) 7-fold connected hepta-arm polymer precursors in combination with a complex that forms up to 6 transient bonds; the corresponding (g) probability of being connected to a finite network, and (h) logarithm of the normalized modulus.**



**Figure S7. Fraction of (a) 2-fold, (b) 3-fold, (c) 4-fold, (d) 5-fold, (e) 6-fold, (f) 6-fold, and (g) 7-fold connected hepta-arm polymer precursors in combination with a complex that forms up to 6 transient bonds; the corresponding (h) probability of being connected to a finite network, and (i) logarithm of the normalized modulus.**



**Figure S8.** Fraction of (a) 2-fold, (b) 3-fold, (c) 4-fold, (d) 5-fold connected penta-arm polymer precursors in combination with a complex that forms up to 4 transient bonds; the corresponding (e) probability of being connected to a finite network, and (f) logarithm of the normalized modulus.



**Figure S9.** Fraction of (a) 2-fold, (b) 3-fold, (c) 4-fold, (d) 5-fold connected penta-arm polymer precursors in combination with a complex that forms up to 3 transient bonds; the corresponding (e) probability of being connected to a finite network, and (f) logarithm of the normalized modulus.



**Figure S10.** Fraction of (a) 2-fold, (b) 3-fold, (c) 4-fold, (d) 5-fold connected penta-arm polymer precursors in combination with a complex that forms up to 2 transient bonds; the corresponding (e) probability of being connected to a finite network, and (f) logarithm of the normalized modulus.

## References

- Aruga, R. (1983). Infrared Spectra of Inorganic and Coordination Compounds. In A. B. P. Lever, *Inorganic Electronic Spectroscopy* (Vol. 8, Issue 3). Interscience.
- Cazzell, S. A., & Holten-Andersen, N. (2019). Expanding the stoichiometric window for metal cross-linked gel assembly using competition. *Proceedings of the National Academy of Sciences of the United States of America*, *116*(43), 21369–21374. <https://doi.org/10.1073/pnas.1906349116>
- Dumpala, R. M. R., Rawat, N., Boda, A., Ali, S. M., & Tomar, B. S. (2018). Complexation of thorium with pyridine monocarboxylate-N-oxides: Thermodynamic and computational studies. *Journal of Chemical Thermodynamics*, *122*, 13–22. <https://doi.org/10.1016/j.jct.2018.02.006>
- Griffith, W. P., Lewis, J., Wilkinson, G., Chem Soc, J., Chemistry, op, H Holyer, B. R., Hubbard, C. D., A Kettle, S. F., & Wilkins, R. G. (1965). Contribution from the Departments of Chemistry and Physics of the University of Cambridge. The Kinetics of Replacement Reactions of Complexes of the Transition Metals with 1,10-Phenanthroline and 2,2'-Bipyridine. In *Russ. J. Inorg. Chem* (Vol. 4, Issue 7). <https://pubs.acs.org/sharingguidelines>
- H Holyer, B. R., Hubbard, C. D., A Kettle, S. F., & Wilkins, R. G. (1965). *Contribution from the The Kinetics of Replacement Reactions of Complexes of the Transition Metals with 2,2,2'-Terpyridine*. <https://pubs.acs.org/sharingguidelines>
- Martell, A. E., Motekaitis, R. J., Clarke, E. T., Delgado, R., Sun, Y., & Ma, R. (1996). Stability constants of metal complexes of macrocyclic ligands with pendant donor groups. *Supramolecular Chemistry*, *6*(3–4), 353–363. <https://doi.org/10.1080/10610279608032555>
- Martell, A. E., & Smith, R. M. (1989). *Critical Stability Constants Second Supplement* (Vol. 6).
- Murphy, J. M., Powell, B. A., & Brumaghim, J. L. (2020). *Stability Constants of Bio-Relevant, Redox-Active Metals with Amino Acids: The Challenges of Weakly Binding Ligands*.
